# Supplementary material for: IGF-1 contributes to the expansion of melanoma-initiating cells through an epithelial-mesenchymal transition process
Source: PubMed Central journal article supplement (PMC5347710; doi:10.18632/oncotarget.12733), 2016-10-18
Supplement: oncotarget-07-82511-s001.pdf [file oncotarget-07-82511-s001.pdf]

## IGF-1 contributes to the expansion of melanoma-initiating cells through an epithelial-mesenchymal transition process

### Supplementary Materials

**A**

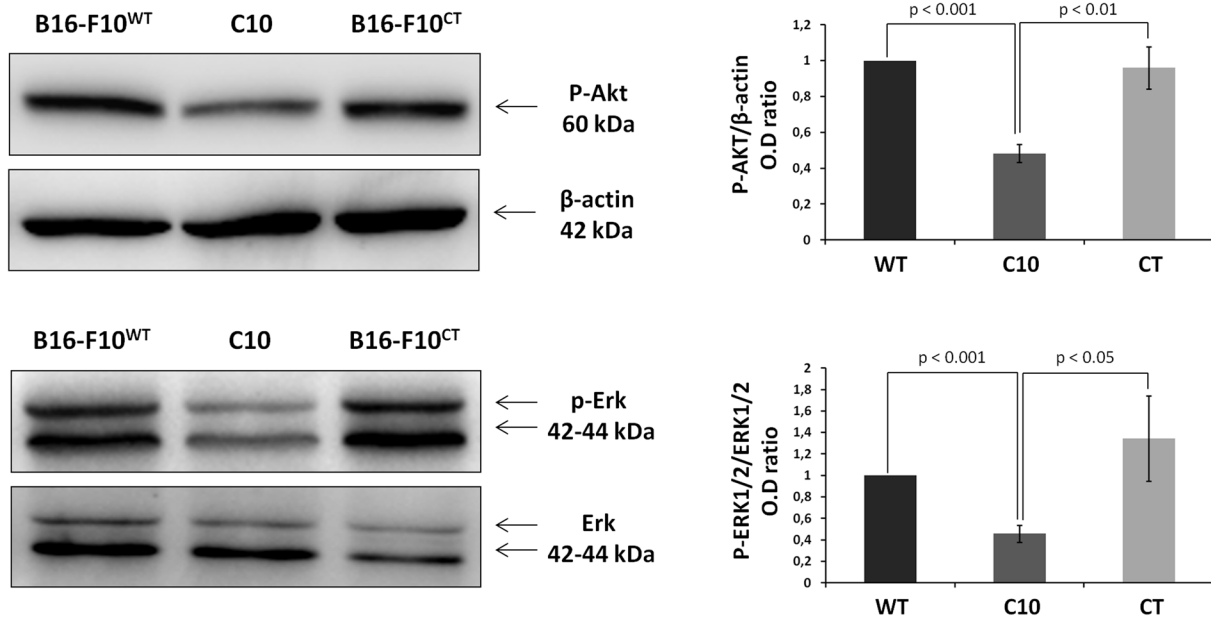

**B**

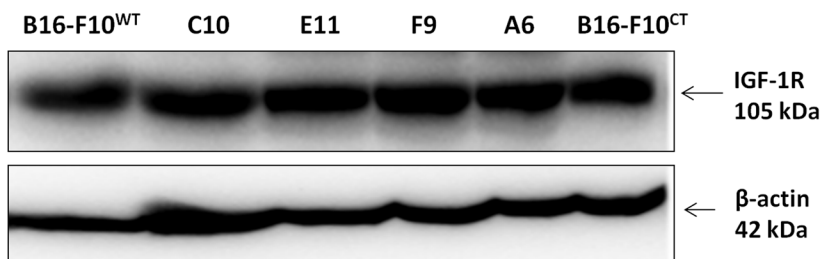

**Supplementary Figure S1: IGF-1 signaling pathways are attenuated in the C10 clone.** (A) Levels of phosphorylated AKT and ERK were analyzed in the C10 clone, B16-F10<sup>CT</sup> and B16-F10<sup>WT</sup> cells, by immunoblotting. The phosphorylation signals were quantified as pAKT and pERK versus total β-actin, and ERK. Data are expressed as the mean ± SEM of 4 independent experiments. C10 cells had lower levels of phosphorylated forms of AKT ( $0.48 \pm 0.05$  versus  $0.96 \pm 0.11$  and  $1 \pm 0$ ,  $p < 0.05$ ,  $n = 4$ ) and ERK-1/2 MAPK ( $0.45 \pm 0.07$  versus  $1.34 \pm 0.39$  and  $1 \pm 0$ ,  $p < 0.05$ ,  $n = 4$ ) than B16-F10<sup>CT</sup> and B16-F10<sup>WT</sup> cells. (B) IGF-1R expression was analyzed in the total lysates of B16-F10<sup>WT</sup> and B16-F10<sup>CT</sup> cells and of the four IGF-1dull clones (A6, C10, E11, F9), by western blotting.

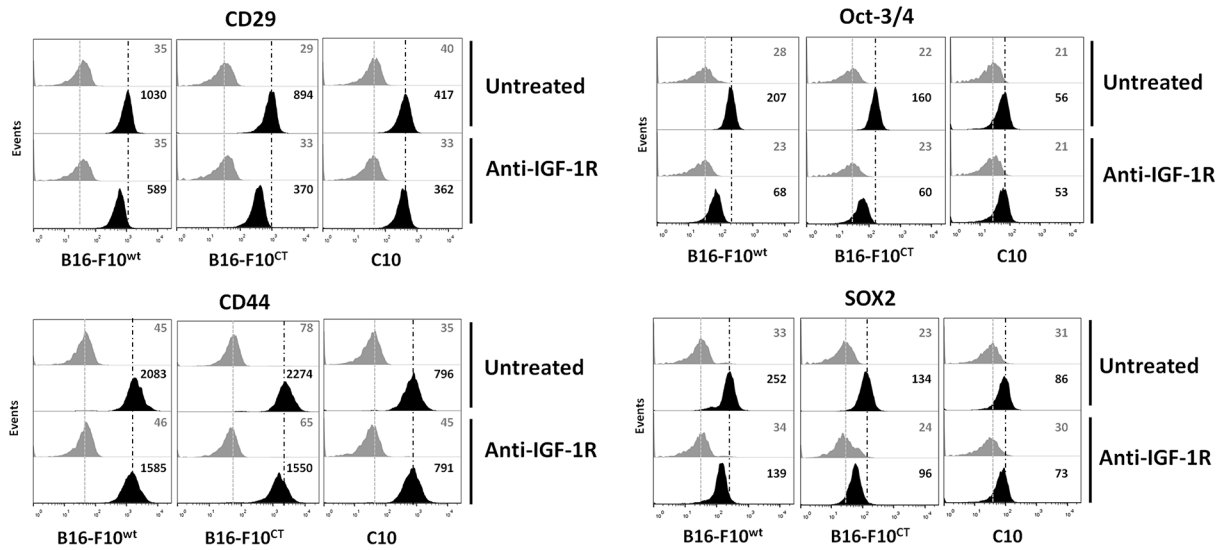

**Supplementary Figure S2: IGF-1R neutralization decreases the expression of EMT and stemness markers in B16-F10<sup>CT</sup> and B16-F10<sup>WT</sup> cells.** Flow cytometry analysis of the CD44 and CD29 mesenchymal markers and of the Oct-3/4 and SOX2 transcription factors in the C10 clone, and in B16-F10<sup>CT</sup> and B16-F10<sup>WT</sup> cells with and without neutralizing IGF-1R antibody (0.2  $\mu$ g/mL) treatment for 48 h.

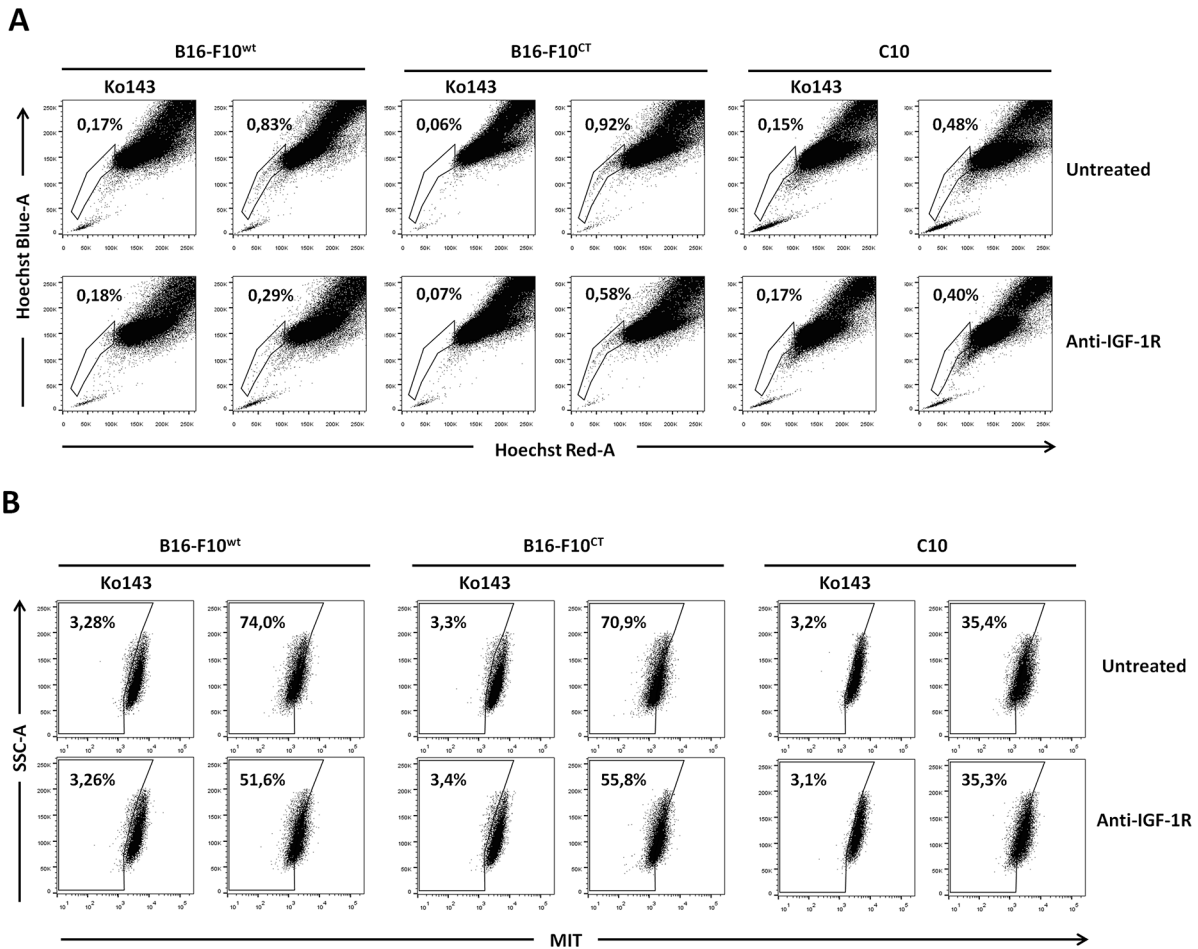

**Supplementary Figure S3: IGF-1R neutralization decreases the drug efflux pump activity of B16-F10<sup>CT</sup> and B16-F10<sup>WT</sup> cells.** (A) Side population (SP) analysis. C10, B16-F10<sup>CT</sup> and B16-F10<sup>WT</sup> cells with and without neutralizing IGF-1R antibody (0.2  $\mu$ g/mL) treatment for 48 h were stained with Hoechst 33342 dye in the presence or absence of Ko143 (1  $\mu$ M) and the SP population was analyzed by flow cytometry. (B) Analysis of the intracellular accumulation of MIT in B16-F10<sup>WT</sup>, B16-F10<sup>CT</sup> and C10 cells with and without neutralizing IGF-1R antibody treatment for 48 h. Mitoxantrone efflux and ABCG2 activity were determined by flow cytometry, by measuring mitoxantrone accumulation in the presence or absence of the ABCG2 inhibitor Ko143 (1  $\mu$ M). Percentages of cells displaying MIT efflux are shown at the top left of each histogram.

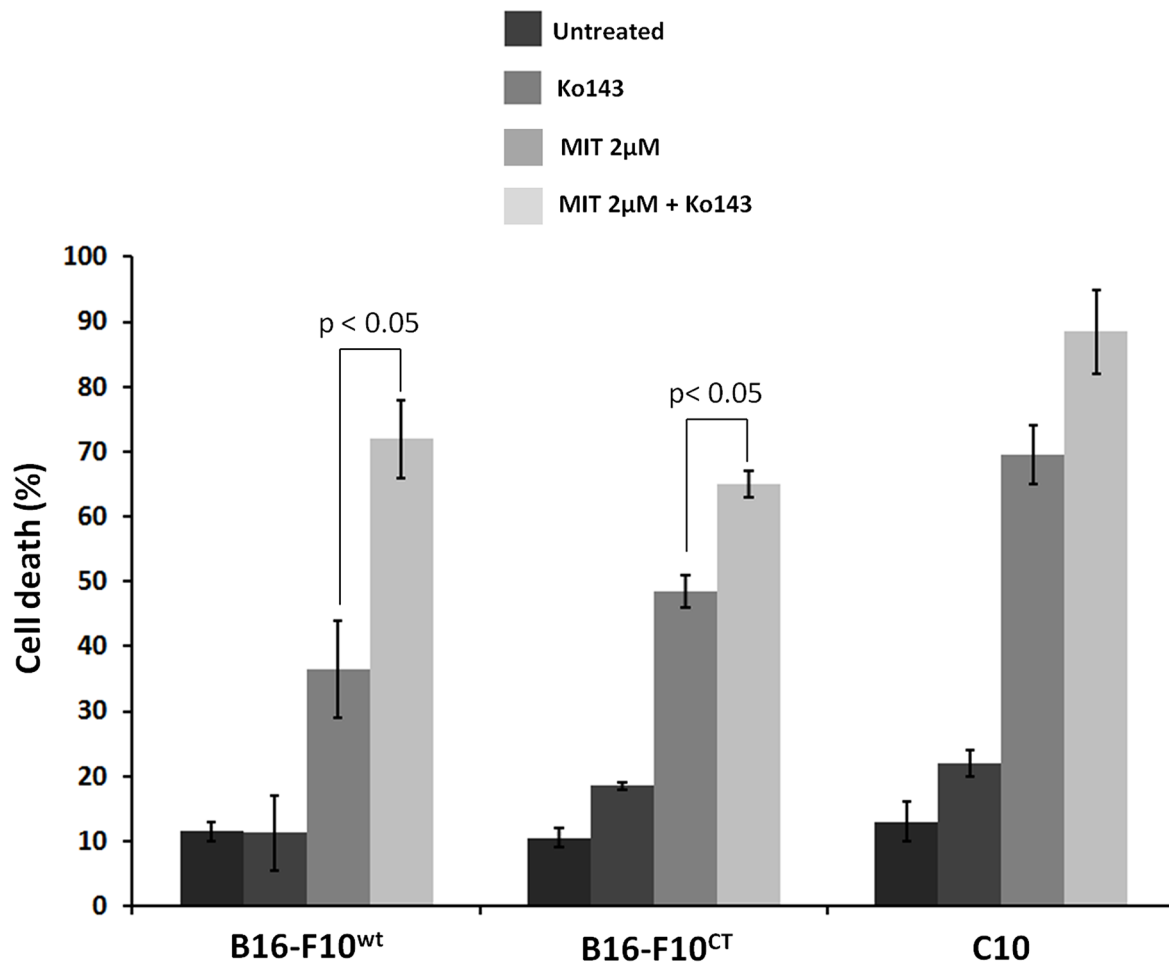

**Supplementary Figure S4: ABCG2 protects B16-F10<sup>WT</sup> and B16-F10<sup>CT</sup> from MIT-induced cell death.** Cells were treated with 2  $\mu$ M mitoxantrone in the presence or absence of the ABCG2 inhibitor Ko143 (1  $\mu$ M) and cell viability was determined 48 h later in the FDA assay. Data are expressed as the mean  $\pm$  SEM. The addition of Ko143 to the culture medium greatly increased cell death in B16-F10CT ( $48.5 \pm 2.5\%$  to  $65.0 \pm 2.0\%$ ,  $p < 0.05$ ,  $n = 3$ ) and B16-F10WT ( $36.5 \pm 7.5\%$  to  $72.0 \pm 6.0\%$ ,  $p < 0.05$ ,  $n = 3$ ) cells treated with 2  $\mu$ M MIT, whereas it had no significant impact on the death of C10 cells.
